# Supplementary material for: Synthesis of single-walled carbon nanotube-incorporated polymer hydrogels via click chemistry
Source: Royal Society of Chemistry journal article supplement (doi:10.1039/c2py20266b), 2012-01-01
Supplement: c2py20266b.pdf [file c2py20266b.pdf]

*Electronic Supplementary Information for*

## Synthesis of Single-Walled Carbon Nanotube-Incorporated Polymer Hydrogels via Click Chemistry

*Eunji Lee†, Jiyoung Park†, Sung Gap Im\*,‡, and Changsik Song\*,†*

†Department of Chemistry, Sungkyunkwan University, Suwon, Gyeonggi 440-746 Korea.

‡Department of Chemical Engineering, Korea Advanced Institute of Science and Technology,  
Daejeon, 305-701 Korea.

|                                                              |   |
|--------------------------------------------------------------|---|
| Click Test of a-PVA with benzyl azide (Scheme S1).....       | 2 |
| <sup>1</sup> H-NMR spectra (Figure S1) .....                 | 3 |
| FT-IR spectrum (Figure S2).....                              | 4 |
| Ultraviolet–visible spectrum of SWNT/a-PVA (Figure S3) ..... | 4 |
| Raman spectrum of SWNT/a-PVA (Figure S4) .....               | 5 |

**Scheme S1.** Click test of a-PVA with benzyl azide.

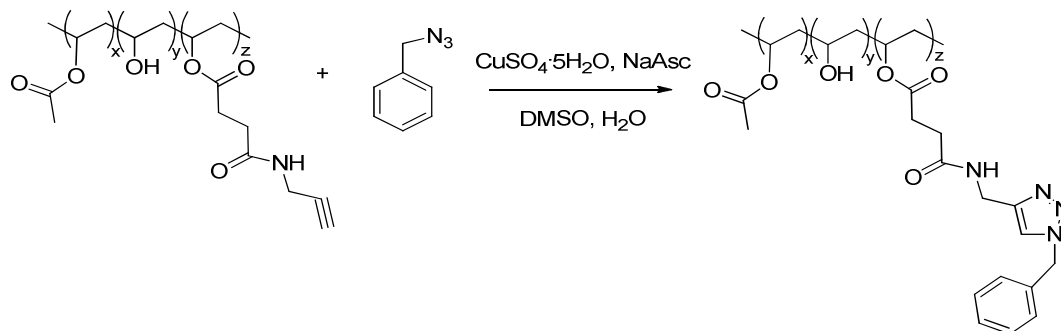

**Click Test of a-PVA.** The existence of alkyne group was verified by click test with benzyl azide from  $^1\text{H-NMR}$ . A solution of a-PVA was prepared from a-PVA powder (100 mg) in 1 mL of dimethyl sulfoxide. Benzyl azide (2.6 mg, 0.02 mmol),  $\text{CuSO}_4 \cdot 5\text{H}_2\text{O}$  (2 mg, 0.01 mmol), and sodium ascorbate (4 mg, 0.02 mmol) were added to the a-PVA solution. The mixture was stirred for 1 hr at room temperature, and the product was precipitated in acetone, collected, and dried in air.  $^1\text{H-NMR}$  was recorded from the solid without any further purification.  $^1\text{H-NMR}$  (300 MHz,  $\text{D}_2\text{O}$ )  $\delta$ : 7.90 (s, 1H), 7.40-7.00 (m, 5H), 5.57-5.27 (s, 2H), 5.23-4.77 (m, 12.5H) 4.04-3.20 (m, 25.1H), 2.50 (m, 6H), 2.00-1.85 (m, 7.2H), 1.90 -0.75 (m, 40H)

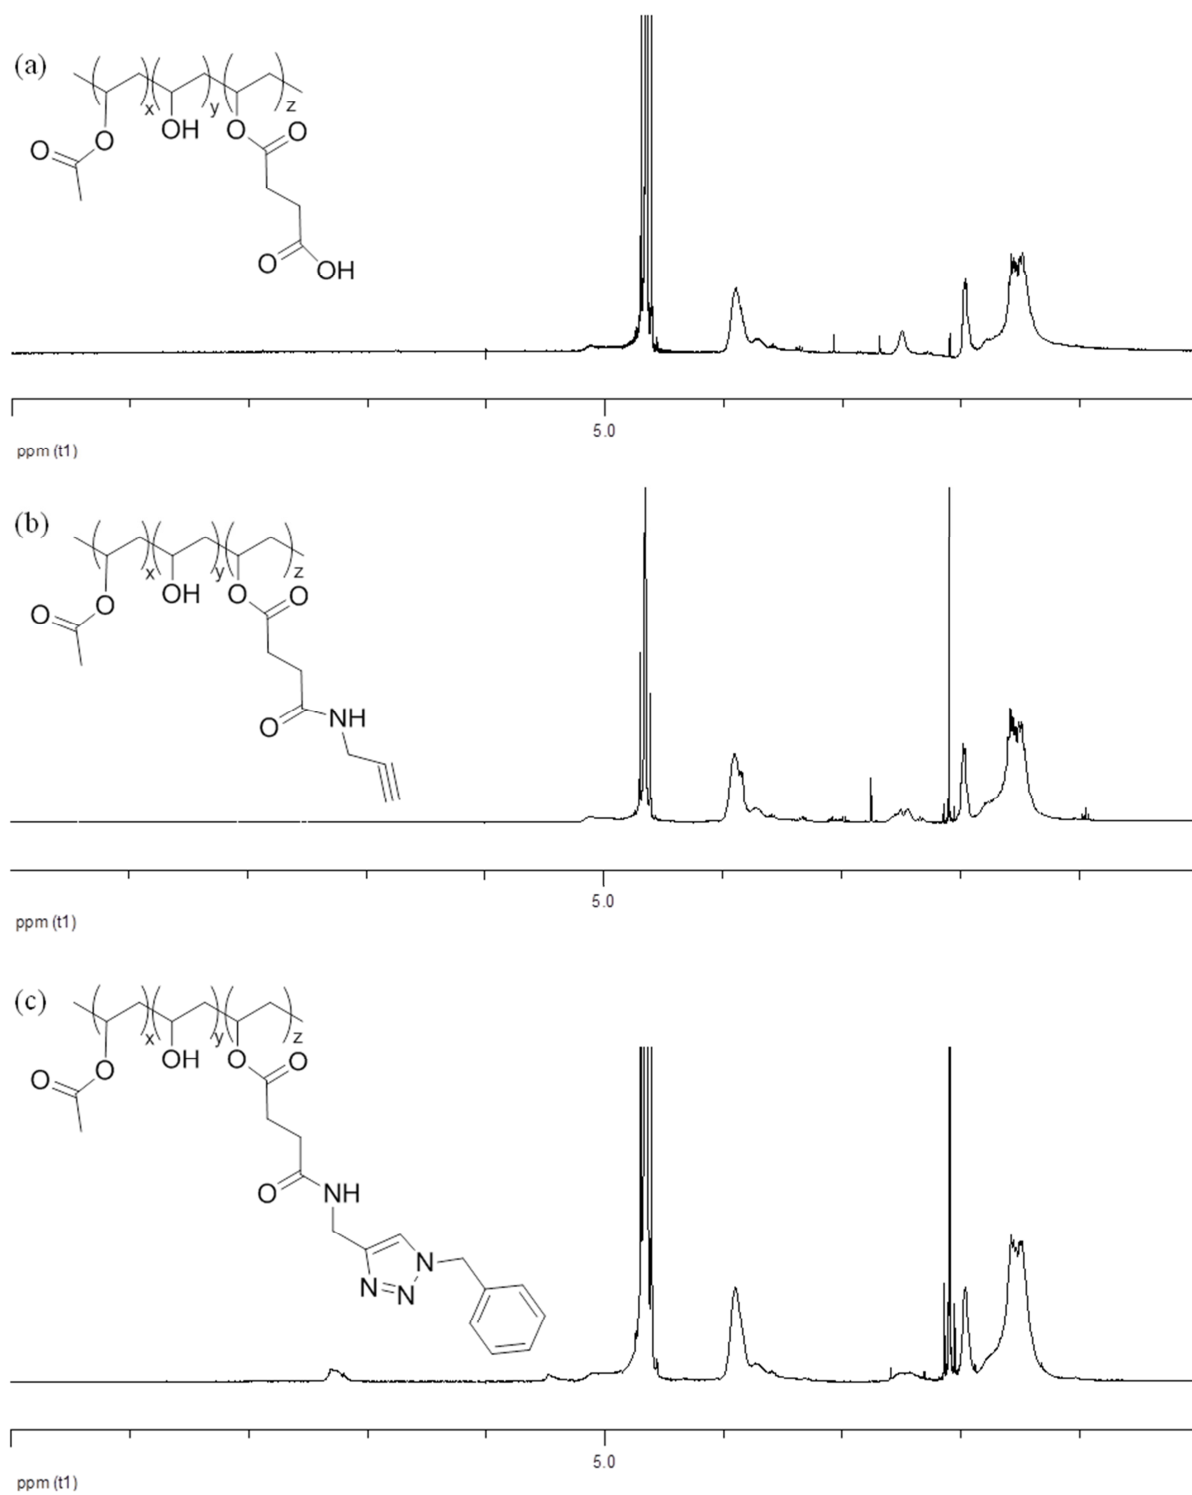

**Figure S1.** <sup>1</sup>H NMR spectra of c-PVA (a), a-PVA (b), and the polymer after the click test of a-PVA with benzyl azide (c).

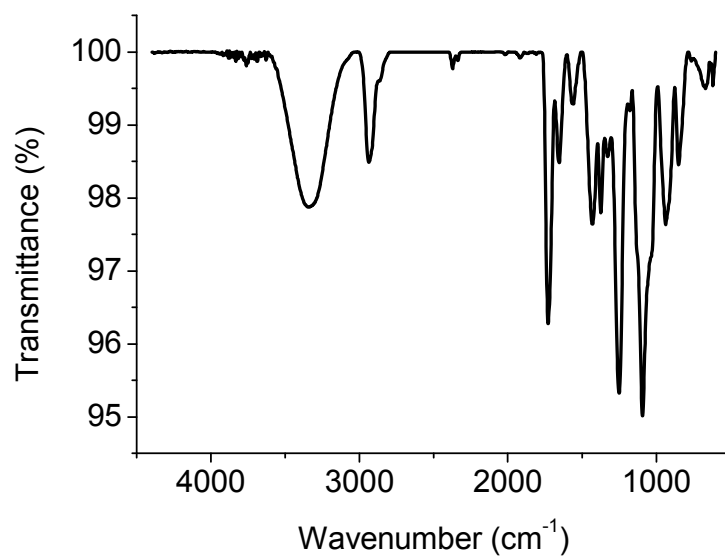

**Figure S2.** FT-IR spectrum of a-PVA.

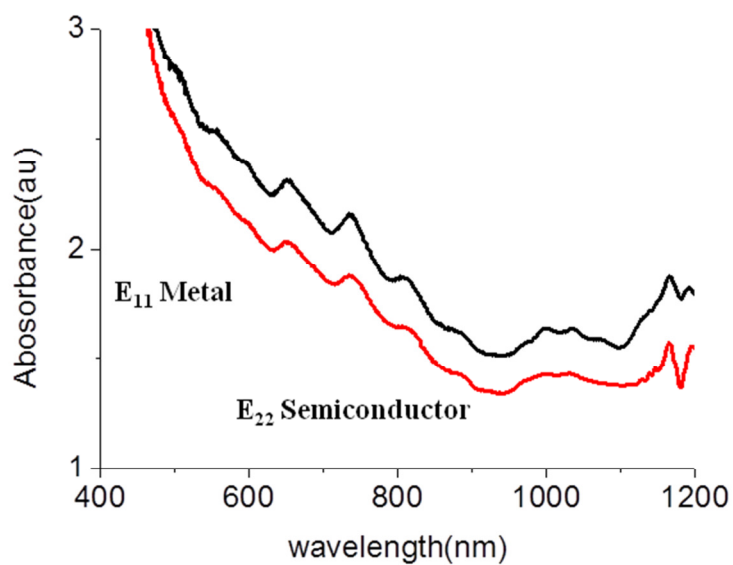

**Figure S3.** UV-vis-NIR spectra of SWNT/a-PVA in DMSO as a solution (black) and after the click gel formation (red).

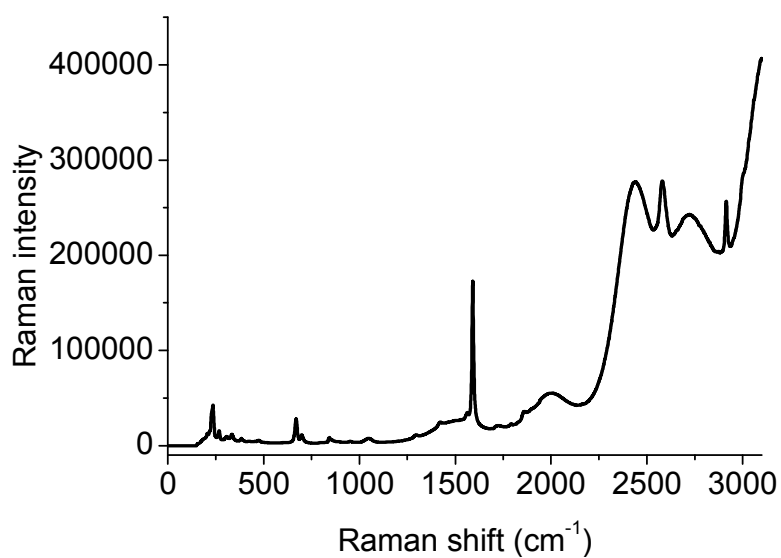

**Figure S4.** Raman spectrum of SWNT/a-PVA in DMSO. The peaks after 1700 cm<sup>-1</sup> are from the fluorescence of semiconducting carbon nanotubes.
